# Supplementary material
Source: PubMed Central journal article supplement (PMC7380118)
Supplement: NIHMS1603077-supplement-1.pdf [file NIHMS1603077-supplement-1.pdf]

**Table S1. Patient cohort and characteristics for CIRI-DLBCL, Related to Figure 1.**

|                                        |                                   | Development Set | Validation Set |
|----------------------------------------|-----------------------------------|-----------------|----------------|
| <b>Number of Subjects</b>              |                                   | 49              | 132            |
| <b>Median Age</b>                      |                                   | 61              | 55             |
| <b>Diagnosis, n (%)</b>                |                                   |                 |                |
|                                        | DLBCL                             | 33 (67%)        | 106 (80%)      |
|                                        | DLBCL, transformed low grade      | 15 (31%)        | 4 (3%)         |
|                                        | PMBCL                             | 1 (2%)          | 22 (17%)       |
| <b>Stage, n (%)</b>                    |                                   |                 |                |
|                                        | 1                                 | 7 (14%)         | 12 (9%)        |
|                                        | 2                                 | 6 (12%)         | 38 (29%)       |
|                                        | 3                                 | 8 (16%)         | 19 (14%)       |
|                                        | 4                                 | 28 (57%)        | 63 (48%)       |
|                                        | Not available                     | 0 (0%)          | 0 (0%)         |
| <b>IPI, n (%)</b>                      |                                   |                 |                |
|                                        | 0 to 1                            | 15 (31%)        | 54 (41%)       |
|                                        | 2                                 | 13 (27%)        | 30 (23%)       |
|                                        | 3                                 | 9 (18%)         | 30 (23%)       |
|                                        | 4 to 5                            | 12 (24%)        | 18 (14%)       |
|                                        | Not available                     | 0 (0%)          | 0 (0%)         |
| <b>Molecular Features, n (%)</b>       |                                   |                 |                |
|                                        | GCB                               | 14 (29%)        | 49 (37%)       |
|                                        | non-GCB                           | 11 (22%)        | 48 (36%)       |
|                                        | Not applicable                    | 24 (49%)        | 35 (27%)       |
| <b>Early Molecular Response, n (%)</b> |                                   |                 |                |
|                                        | EMR                               | 25 (51%)        | 55 (42%)       |
|                                        | No EMR                            | 10 (20%)        | 15 (11%)       |
|                                        | Not evaluated                     | 14 (29%)        | 62 (47%)       |
| <b>Major Molecular Response, n (%)</b> |                                   |                 |                |
|                                        | MMR                               | 25 (51%)        | 60 (45%)       |
|                                        | No MMR                            | 7 (14%)         | 20 (15%)       |
|                                        | Not evaluated                     | 17 (35%)        | 52 (39%)       |
| <b>Interim Imaging, n (%)</b>          |                                   |                 |                |
|                                        | Residual Disease                  | 26 (53%)        | 20 (15%)       |
|                                        | No Residual Disease               | 18 (37%)        | 57 (43%)       |
|                                        | Not evaluated                     | 5 (10%)         | 55 (42%)       |
| <b>Lines of Therapy Considered</b>     |                                   |                 |                |
|                                        | R-CHOP                            | 20 (41%)        | 77 (58%)       |
|                                        | EPOCH-R                           | 27 (55%)        | 47 (36%)       |
|                                        | Other anthracycline-based regimen | 2 (4%)          | 8 (6%)         |

This table shows the clinical characteristics for the patients used to develop and validate CIRI-DLBCL (Development Set and Validation Set). The Development Set was used to determine the parameters for pretreatment ctDNA, EMR, and MMR used in CIRI-DLBCL. The parameters for IPI, cell of origin, and interim imaging studies were obtained from the literature.

**Table S2. Parameters for CIRI-DLBCL, Related to Figure 1.**

| Variable             | Patients (n) | P(Event) | Source                                                                          |
|----------------------|--------------|----------|---------------------------------------------------------------------------------|
| Baseline Probability | 1425         | 21.8%    | Sehn, L.H. et al. <i>Blood</i> , 2007 and Ziepert, M. et al. <i>JCO</i> , 2010. |

| Group                            | Patients (n) | P(Feature   Event) | P(Feature   No Event) | Source                                                                                                                                                                                                                                                                                                                                        |
|----------------------------------|--------------|--------------------|-----------------------|-----------------------------------------------------------------------------------------------------------------------------------------------------------------------------------------------------------------------------------------------------------------------------------------------------------------------------------------------|
| International Prognostic Index   |              |                    |                       | Ziepert, M. et al. <i>JCO</i> , 2010.                                                                                                                                                                                                                                                                                                         |
| 0 to 1                           | 553          | 27.3%              | 58.7%                 |                                                                                                                                                                                                                                                                                                                                               |
| 2                                | 227          | 23.0%              | 21.0%                 |                                                                                                                                                                                                                                                                                                                                               |
| 3                                | 175          | 30.5%              | 12.9%                 |                                                                                                                                                                                                                                                                                                                                               |
| 4 to 5                           | 105          | 19.2%              | 7.5%                  |                                                                                                                                                                                                                                                                                                                                               |
| Cell Of Origin                   |              |                    |                       | Scott, D.W. et al. <i>JCO</i> , 2015.                                                                                                                                                                                                                                                                                                         |
| GCB                              | 186          | 39.8%              | 63.1%                 |                                                                                                                                                                                                                                                                                                                                               |
| non-GCB                          | 143          | 60.2%              | 36.9%                 |                                                                                                                                                                                                                                                                                                                                               |
| Interim Imaging                  |              |                    |                       | Cashen, A. et al. <i>J Nucl Med</i> , 2011; Micallef, I.N. et al. <i>Blood</i> , 2011; Nols, N. et al. <i>Leuk Lymphoma</i> , 2014; Pregno, P. et al. <i>Blood</i> , 2012; Safar, V et al. <i>JCO</i> , 2012; Yang, D.H. et al, <i>Eur J Cancer</i> , 2011; Yoo C. et al. <i>Ann Hematol</i> , 2011; Zinzani, P. et al. <i>Cancer</i> , 2011. |
| Interim Imaging Positive         | 257          | 58.3%              | 21.5%                 |                                                                                                                                                                                                                                                                                                                                               |
| Interim Imaging Negative         | 547          | 41.7%              | 78.5%                 |                                                                                                                                                                                                                                                                                                                                               |
| Pretreatment ctDNA               |              |                    |                       | Current study, Development Set                                                                                                                                                                                                                                                                                                                |
| ctDNA High (> 2.5 log h.G.E./mL) | 27           | 76.5%              | 43.8%                 |                                                                                                                                                                                                                                                                                                                                               |
| ctDNA Low (< 2.5 log h.G.E./mL)  | 22           | 23.5%              | 56.3%                 |                                                                                                                                                                                                                                                                                                                                               |
| Early Molecular Response         |              |                    |                       | Current study, Development Set                                                                                                                                                                                                                                                                                                                |
| EMR                              | 25           | 57.1%              | 81.0%                 |                                                                                                                                                                                                                                                                                                                                               |
| No EMR                           | 10           | 42.9%              | 19.0%                 |                                                                                                                                                                                                                                                                                                                                               |
| Major Molecular Response         |              |                    |                       | Current study, Development Set                                                                                                                                                                                                                                                                                                                |
| MMR                              | 25           | 50.0%              | 95.0%                 |                                                                                                                                                                                                                                                                                                                                               |
| No MMR                           | 7            | 50.0%              | 5.0%                  |                                                                                                                                                                                                                                                                                                                                               |

This table shows the parameters used in CIRI-DLBCL, including the baseline probability of an event for the general population, as well as the conditional probabilities of having a risk feature given an event.

**Table S3. Patient cohort and characteristics for CIRI-CLL, Related to Figure 3.**

|                                 |                             | Development Set | Validation Set |
|---------------------------------|-----------------------------|-----------------|----------------|
| <b>Number of Subjects</b>       |                             | 699             | 727            |
| <b>Median Age</b>               |                             | 63              | 61             |
|                                 | >65                         | 288 (41%)       | 261 (36%)      |
|                                 | <65                         | 409 (59%)       | 465 (64%)      |
| <b>Sex</b>                      |                             |                 |                |
|                                 | Male                        | 478 (68%)       | 516 (71%)      |
|                                 | Female                      | 221 (32%)       | 211 (29%)      |
| <b>TP53 Alterations</b>         |                             |                 |                |
|                                 | Mutation or 17p deletion    | 41 (6%)         | 58 (8%)        |
|                                 | No Mutation or 17p deletion | 627 (90%)       | 631 (87%)      |
|                                 | Not Evaluated               | 31 (4%)         | 38 (5%)        |
| <b>IGHV Status</b>              |                             |                 |                |
|                                 | Mutated                     | 229 (33%)       | 227 (31%)      |
|                                 | Unmutated                   | 427 (61%)       | 442 (61%)      |
|                                 | Not Evaluated               | 43 (6%)         | 58 (8%)        |
| <b>Beta2 Microglobulin</b>      |                             |                 |                |
|                                 | Low                         | 435 (62%)       | 453 (62%)      |
|                                 | High                        | 244 (35%)       | 241 (33%)      |
|                                 | Not Evaluated               | 20 (3%)         | 33 (5%)        |
| <b>Binet stage</b>              |                             |                 |                |
|                                 | A                           | 121 (17%)       | 124 (17%)      |
|                                 | B                           | 343 (49%)       | 350 (48%)      |
|                                 | C                           | 234 (33%)       | 253 (35%)      |
| <b>CLL IPI</b>                  |                             |                 |                |
|                                 | Low                         | 127 (18%)       | 163 (22%)      |
|                                 | Intermediate                | 279 (40%)       | 273 (38%)      |
|                                 | High                        | 256 (37%)       | 246 (34%)      |
|                                 | Very High                   | 37 (5%)         | 45 (6%)        |
| <b>MRD at Interim Timepoint</b> |                             |                 |                |
|                                 | Positive                    | 484 (69%)       | 503 (69%)      |
|                                 | Negative                    | 101 (14%)       | 101 (14%)      |
|                                 | Not Evaluated               | 114 (16%)       | 123 (17%)      |
| <b>MRD at Final Restaging</b>   |                             |                 |                |
|                                 | Positive                    | 320 (46%)       | 343 (47%)      |
|                                 | Negative                    | 217 (31%)       | 231 (32%)      |
|                                 | Not Evaluated               | 162 (23%)       | 153 (21%)      |
| <b>Study of Enrollment</b>      |                             |                 |                |
|                                 | CLL8                        | 185 (26%)       | 219 (30%)      |
|                                 | CLL10                       | 224 (32%)       | 213 (29%)      |
|                                 | CLL11                       | 290 (41%)       | 295 (41%)      |
| <b>Therapy</b>                  |                             |                 |                |
|                                 | FC                          | 91 (13%)        | 106 (15%)      |
|                                 | FCR                         | 205 (29%)       | 234 (32%)      |
|                                 | BR                          | 113 (16%)       | 92 (13%)       |
|                                 | CLB                         | 42 (6%)         | 44 (6%)        |
|                                 | RCLB                        | 126 (18%)       | 129 (18%)      |
|                                 | GCLB                        | 122 (17%)       | 122 (17%)      |

This table shows the clinical characteristics for the patients used to develop and validate CIRI-CLL (Development Set and Validation Set).

**Table S4. Patient cohort and characteristics for CIRI-BRCA, Related to Figure 4.**

|                               |           | Development Set | Validation Set |
|-------------------------------|-----------|-----------------|----------------|
| <b>Number of Subjects</b>     |           | 955             | 417            |
| <b>Median Age</b>             |           | 60.3            | 49             |
| <b>Stage</b>                  |           |                 |                |
|                               | 1         | 344 (36%)       | 7 (2%)         |
|                               | 2         | 530 (55%)       | 223 (53%)      |
|                               | 3         | 81 (8%)         | 187 (45%)      |
|                               | NA        | 0 (0%)          | 0 (0%)         |
| <b>Grade</b>                  |           |                 |                |
|                               | 1         | 91 (10%)        | 27 (6%)        |
|                               | 2         | 325 (34%)       | 151 (36%)      |
|                               | 3         | 498 (52%)       | 211 (51%)      |
|                               | NA        | 41 (4%)         | 28 (7%)        |
| <b>Receptor Status</b>        |           |                 |                |
|                               | ER+/Her2- | 673 (70%)       | 241 (58%)      |
|                               | ER+/Her2+ | 61 (6%)         | 1 (0%)         |
|                               | ER-/Her2+ | 60 (6%)         | 2 (0%)         |
|                               | ER-/Her2- | 161 (17%)       | 158 (38%)      |
|                               | NA        | 0 (0%)          | 15 (4%)        |
| <b>Residual Cancer Burden</b> |           |                 |                |
|                               | 0         | 0 (0%)          | 89 (21%)       |
|                               | 1         | 0 (0%)          | 29 (7%)        |
|                               | 2         | 0 (0%)          | 189 (45%)      |
|                               | 3         | 0 (0%)          | 110 (26%)      |
|                               | NA        | 955 (100%)      | 0 (0%)         |

This table shows the clinical characteristics for the patients used to develop and validate CIRI-BRCA (Development Set and Validation Set). The Development Set was used to determine the parameters for clinical stage, grade, and receptor status used in CIRI-BRCA. The parameters for pathologic response to chemotherapy (i.e., residual cancer burden) were obtained from the literature.

**Table S5. P-values for Schoenfeld residuals for CIRI, Related to STAR Methods.**

| DLBCL Model          |             | CLL Model                      |             | BRCA Model         |             |
|----------------------|-------------|--------------------------------|-------------|--------------------|-------------|
| Risk Factor          | P-Value     | Risk Factor                    | P-Value     | Risk Factor        | P-Value     |
| IPI = 0,1            | 0.11        | CLL-IPI = 0,1                  | 0.26        | Type = ER-/Her2-   | 0.57        |
| IPI = 2              | 0.85        | CLL-IPI = 2,3                  | 0.09        | Type = ER-/Her2+   | 0.98        |
| IPI = 3              | 0.17        | CLL-IPI = 4-6                  | 0.19        | Type = ER+/Her2-   | 0.80        |
| IPI = 4,5            | -           | CLL-IPI = 7-10                 | -           | Type = ER+/Her2+   | 1.00        |
| COO = GCB            | 0.58        | Treatment = FC                 | 0.63        | Grade = 1          | 0.22        |
| COO = non-GCB        | 0.29        | Treatment = FCR                | 0.61        | Grade = 2          | 0.92        |
| pretx ctDNA low      | 0.09        | Treatment = BR                 | 0.34        | Grade = 3          | 0.98        |
| pretx ctDNA high     | -           | Treatment = Chlorambucil       | -           | Stage = 1          | 0.18        |
| EMR                  | 0.08        | Treatment = R-<br>Chlorambucil | 0.17        | Stage = 2          | 0.12        |
| No EMR               | 0.35        | Treatment = G-<br>Chlorambucil | -           | Stage = 3          | -           |
| MMR                  | 0.79        | Interim MRD negative           | 0.19        | RCB = 0            | 0.99        |
| No MMR               | 0.32        | Interim MRD positive           | 0.51        | RCB = 1            | 0.13        |
| PET no residual dx   | 0.91        | Final MRD negative             | 0.44        | RCB = 2            | 0.07        |
| PET residual disease | 0.0002      | Final MRD positive             | 0.33        | RCB = 3            | -           |
| <b>Global DLBCL</b>  | <b>0.08</b> | <b>Global CLL</b>              | <b>0.25</b> | <b>Global BRCA</b> | <b>0.40</b> |

This table shows the individual and global P-values assessing the proportional hazard assumption by Schoenfeld residuals for each CIRI model (CIRI-DLBCL, CIRI-CLL, and CIRI-BRCA).
