# Supplementary material
Source: PubMed Central journal article supplement (PMC7380118)

# Figure S2

## A Baseline Survival Function

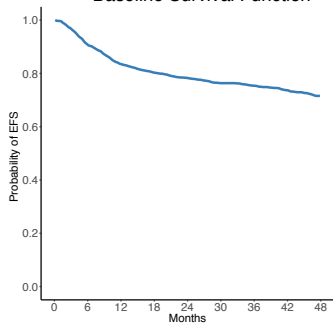

## B Parameter Training, IPI

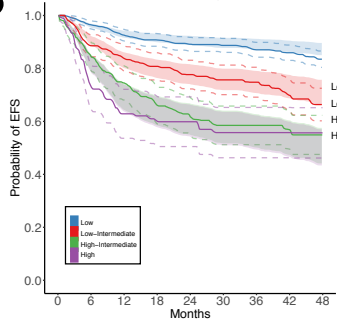

## C Parameter Training, COO

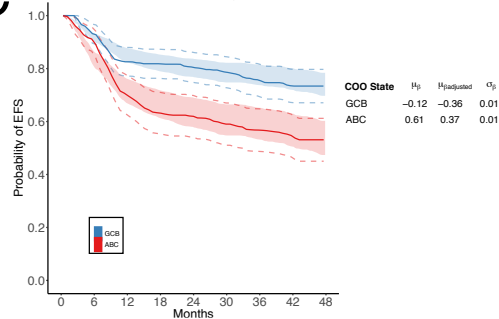

## D Parameter Training, Pretreatment ctDNA

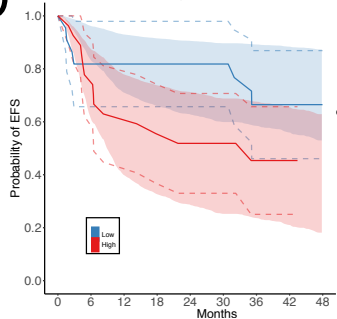

## E Parameter Training, EMR

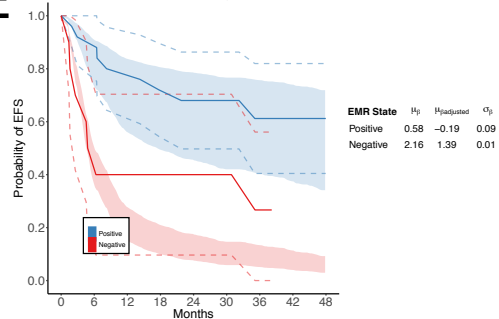

## F Parameter Training, MMR

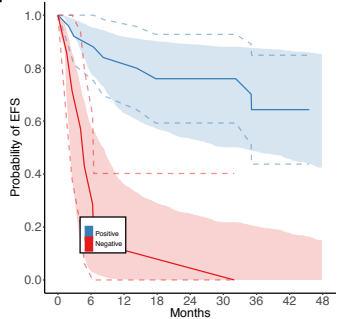

## G Parameter Training, Interim PET

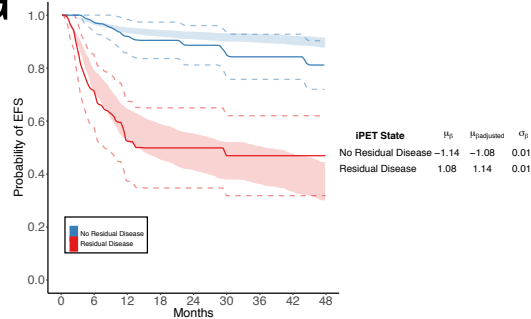

## H

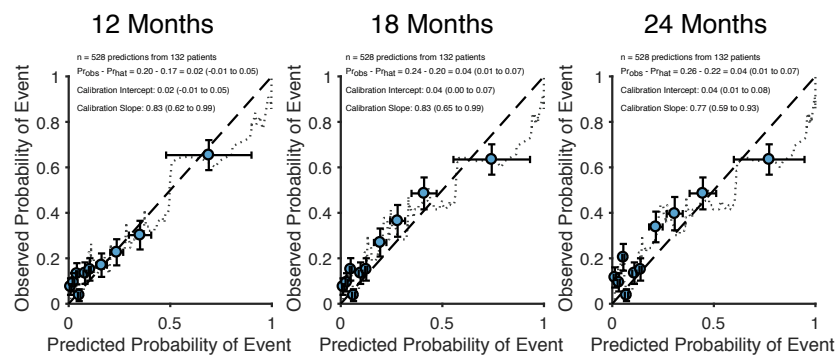

## I Prediction of OS12

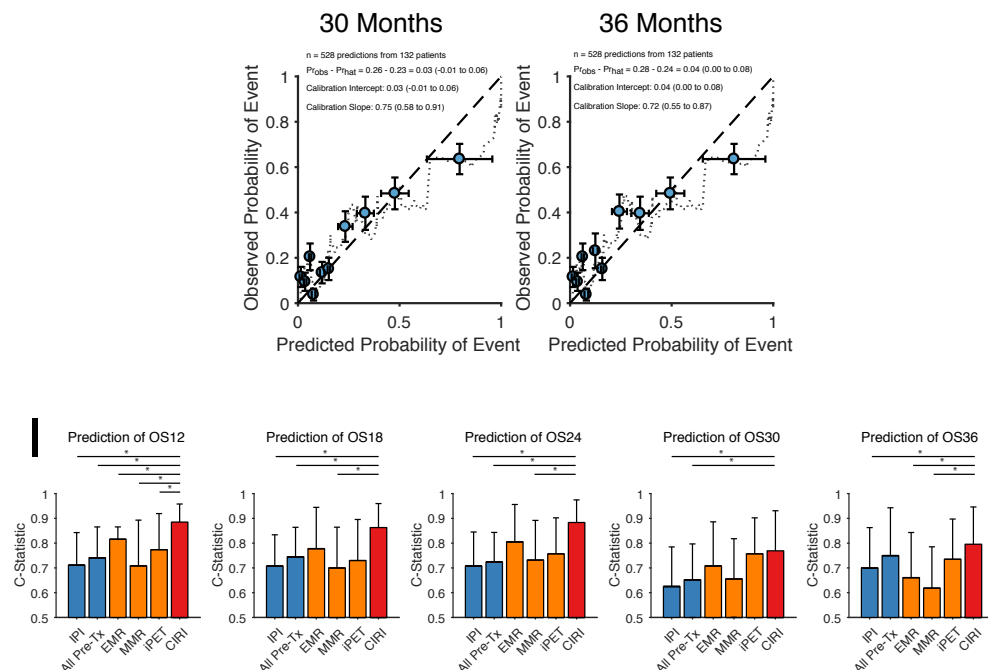

## J

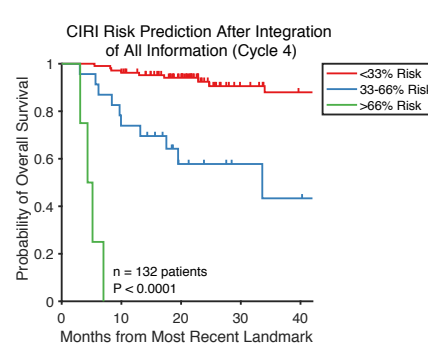

## K

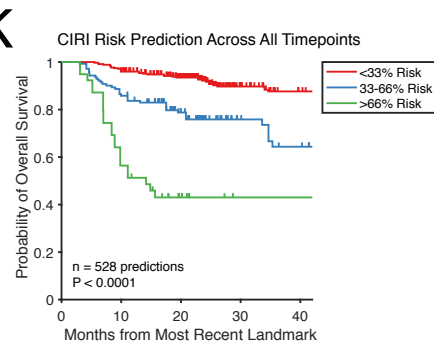

Supplement: NIHMS1603077-supplement-3.pdf [file NIHMS1603077-supplement-3.pdf]
