# Supplementary material
Source: PubMed Central journal article supplement (PMC7380118)

# Supplementary Dataset

## Benefit of FCR vs alternative therapies in CLL

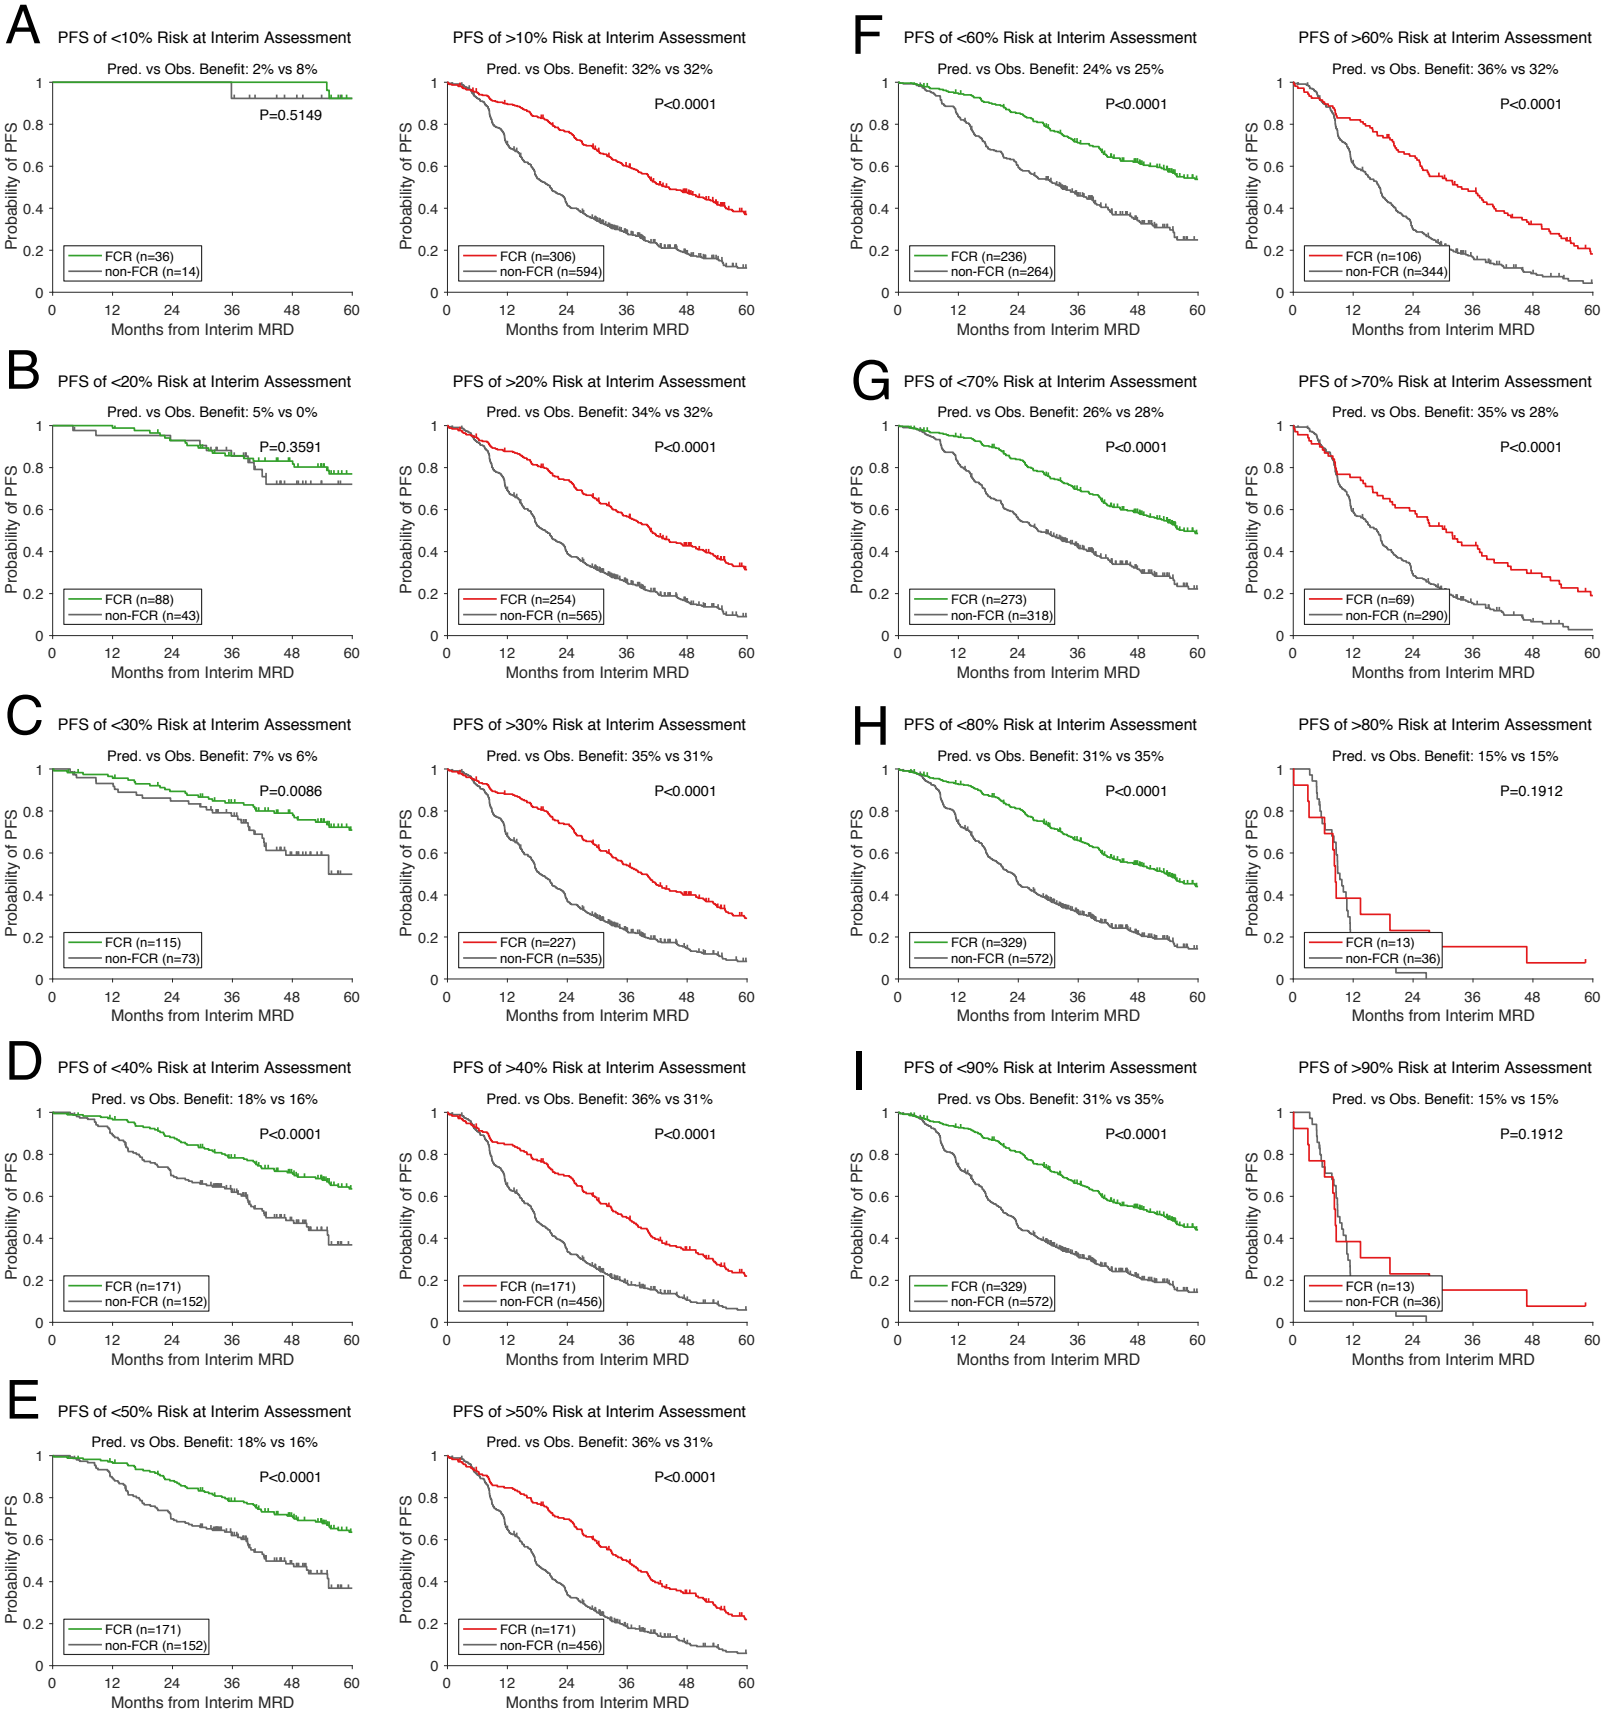

# Benefit of Trastuzumab + Pertuzumab in BRCA

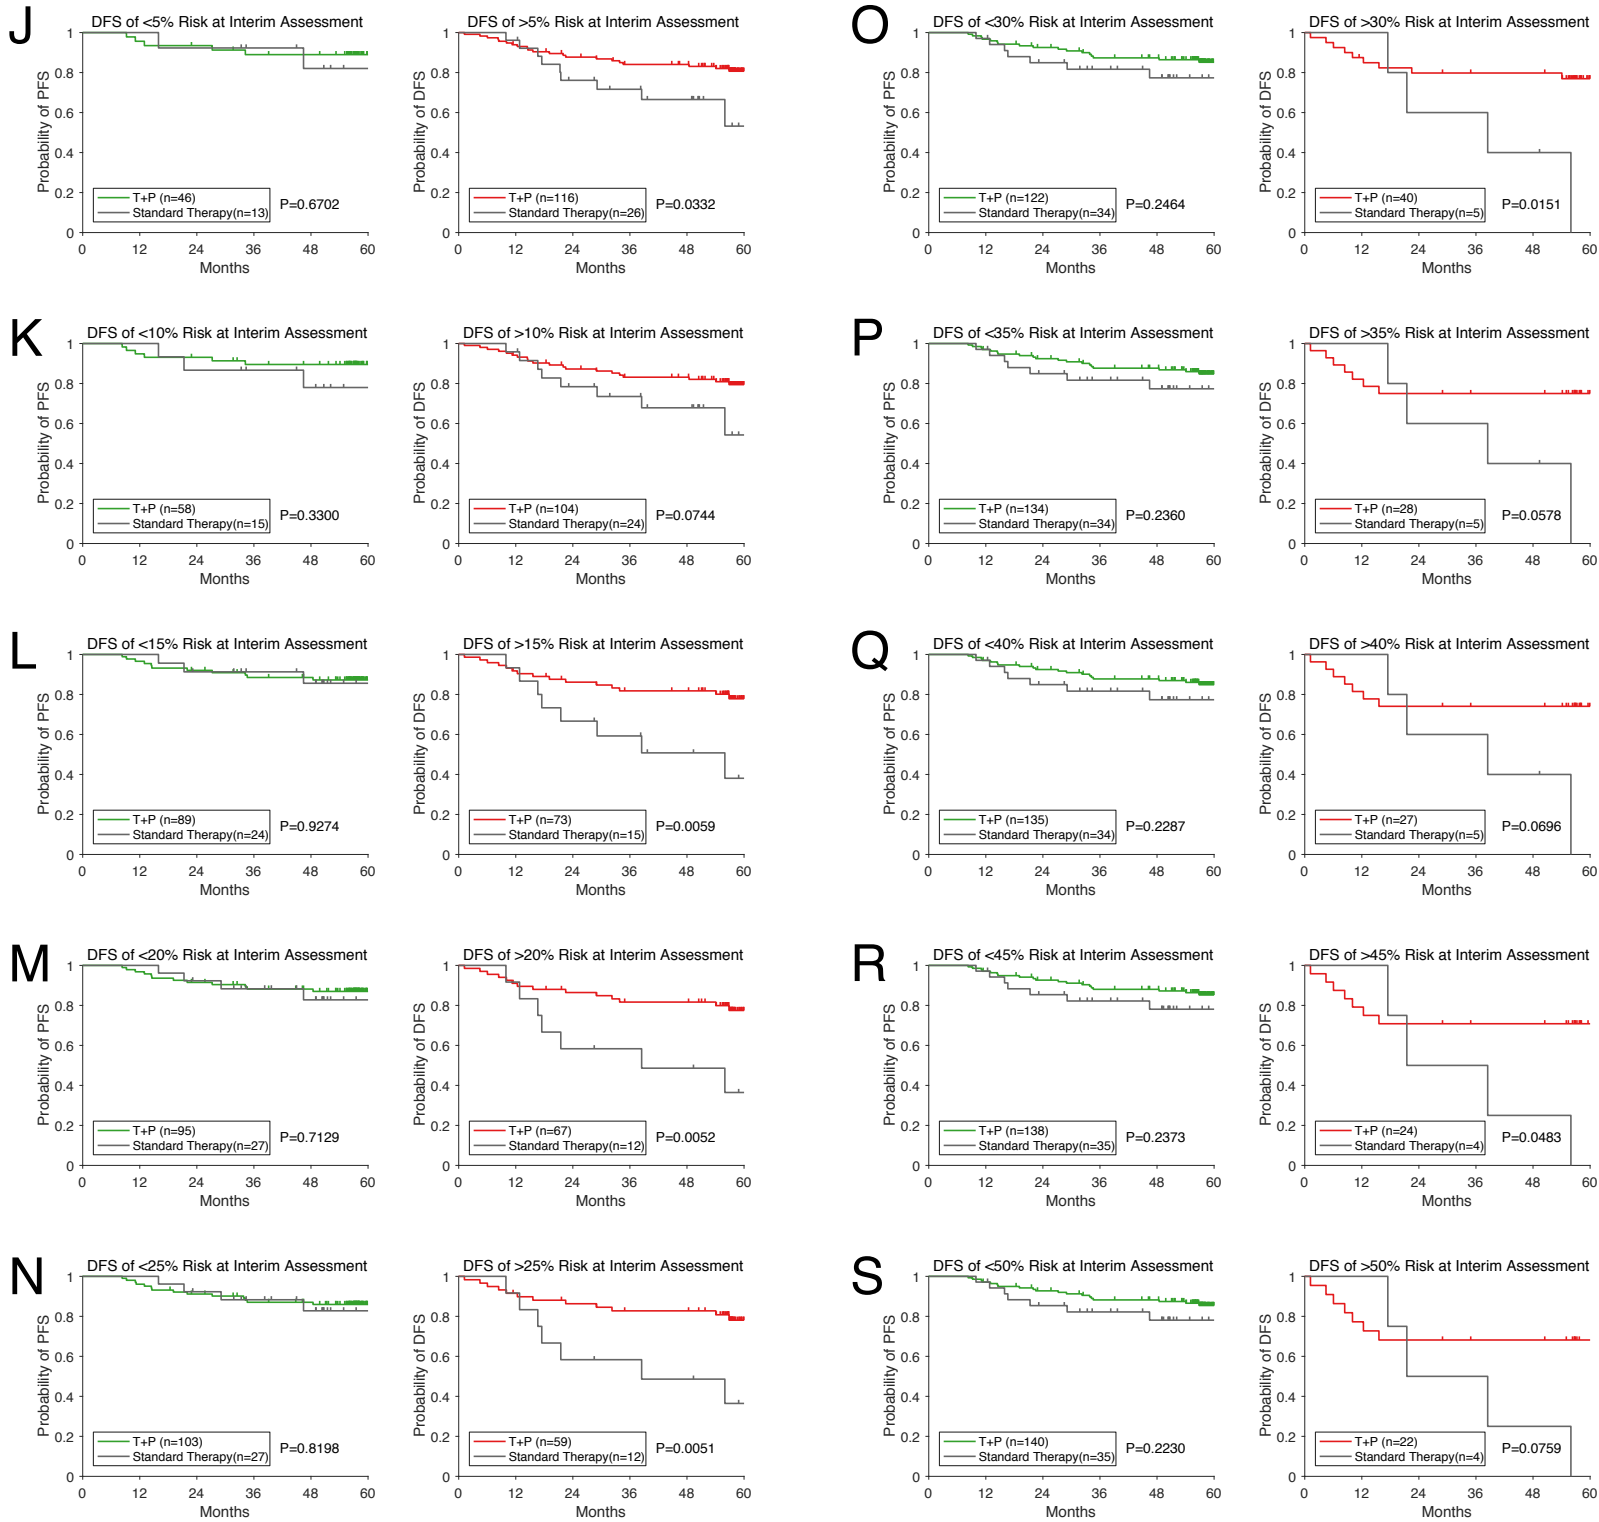

Supplement: NIHMS1603077-supplement-8.pdf [file NIHMS1603077-supplement-8.pdf]
