# Supplementary material
Source: PubMed Central journal article supplement (PMC7380118)

# Figure S1

## A

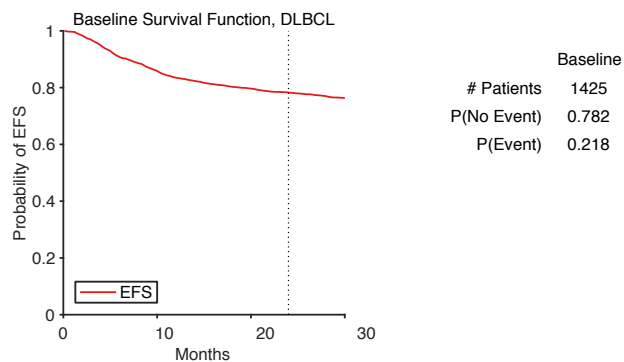

## B

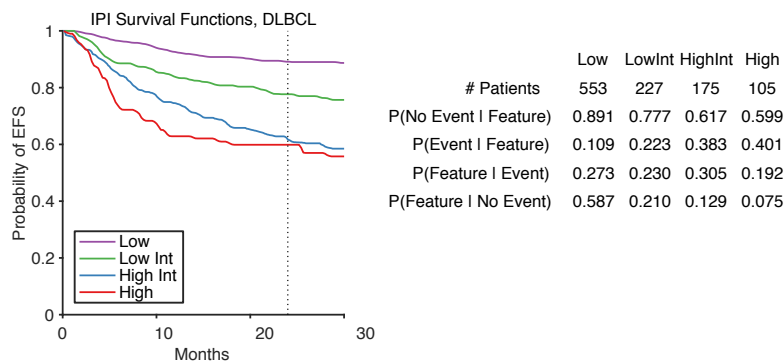

## C

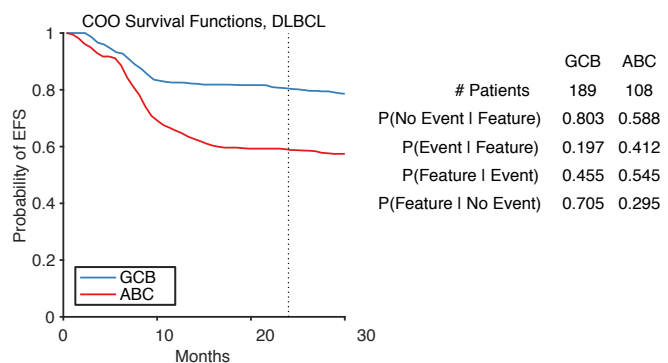

## D

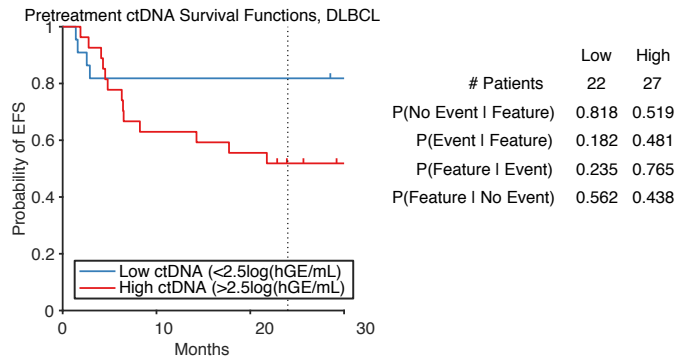

## E

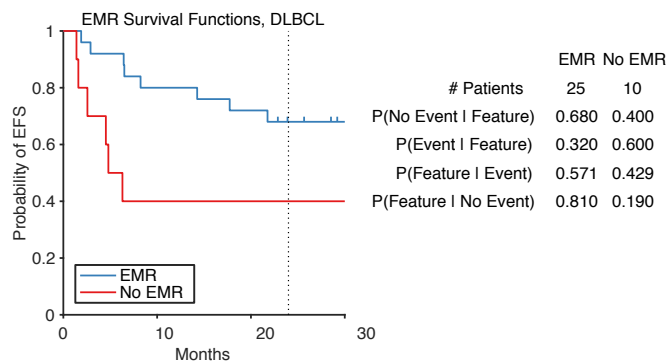

## F

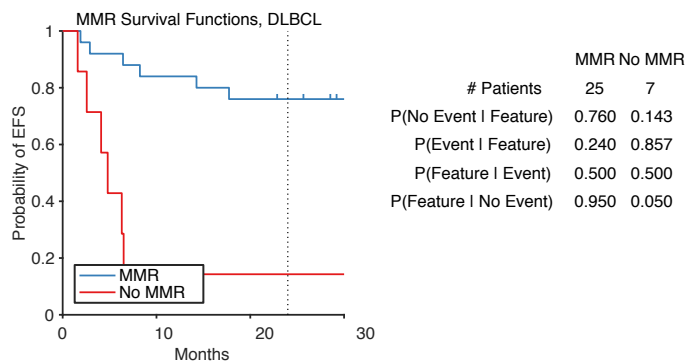

## G

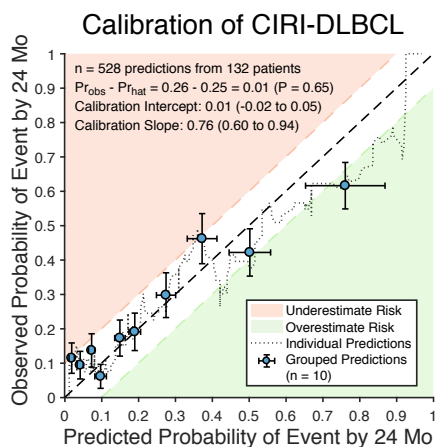

## H

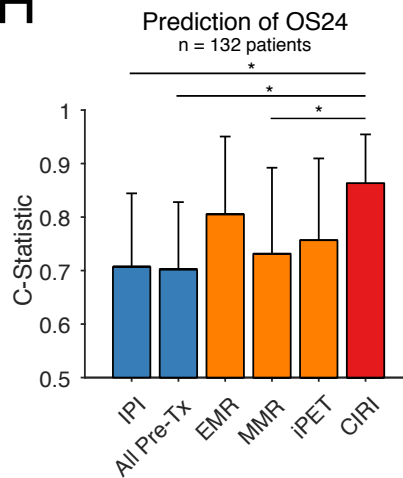

Supplement: NIHMS1603077-supplement-2.pdf [file NIHMS1603077-supplement-2.pdf]

# Figure S3

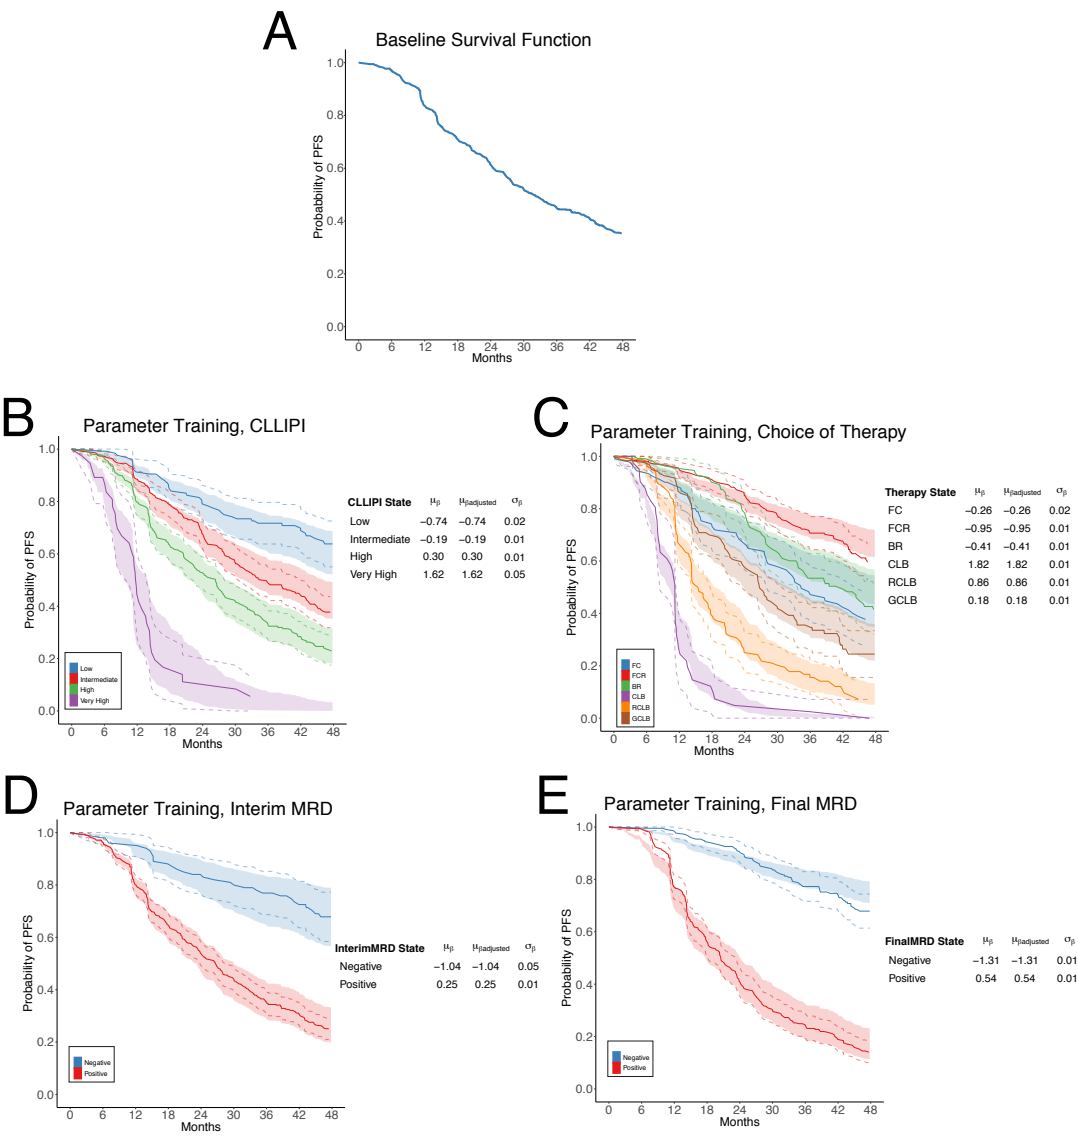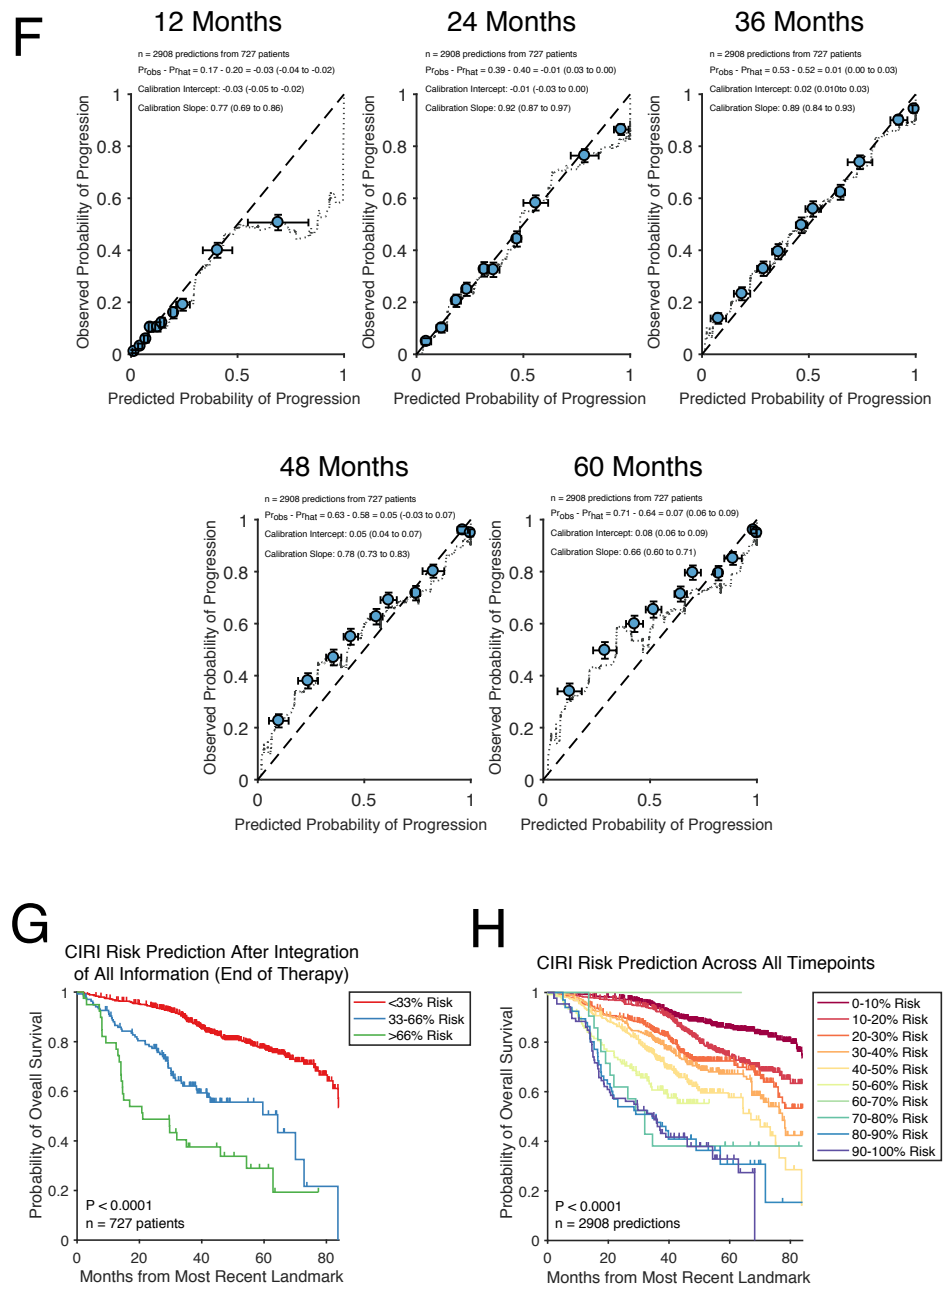

Supplement: NIHMS1603077-supplement-4.pdf [file NIHMS1603077-supplement-4.pdf]

# Figure S4

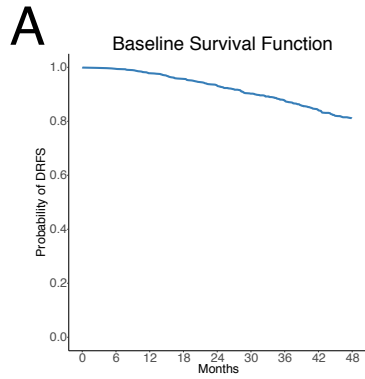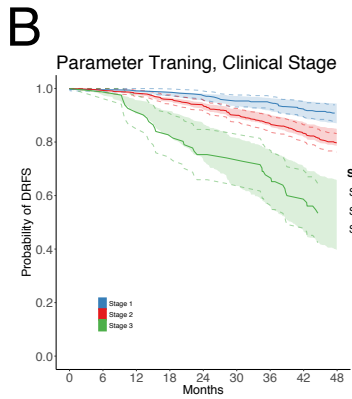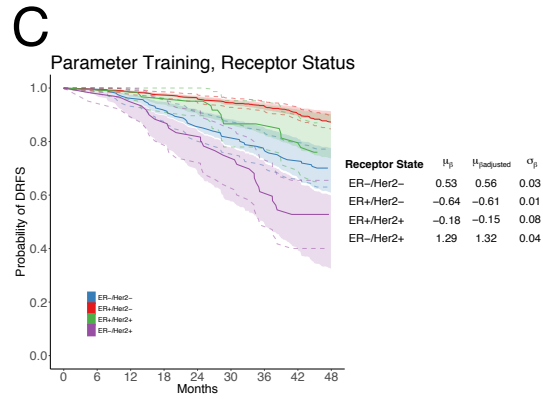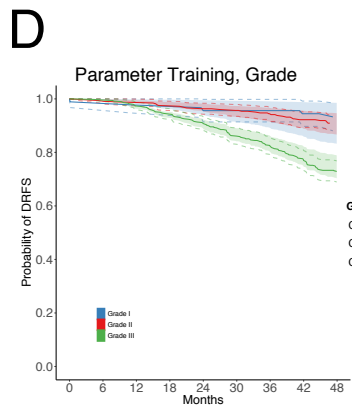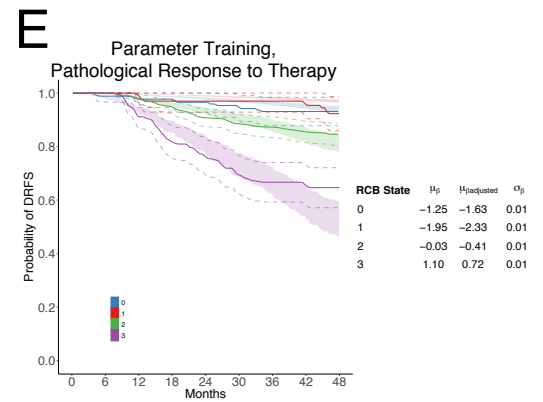

# F

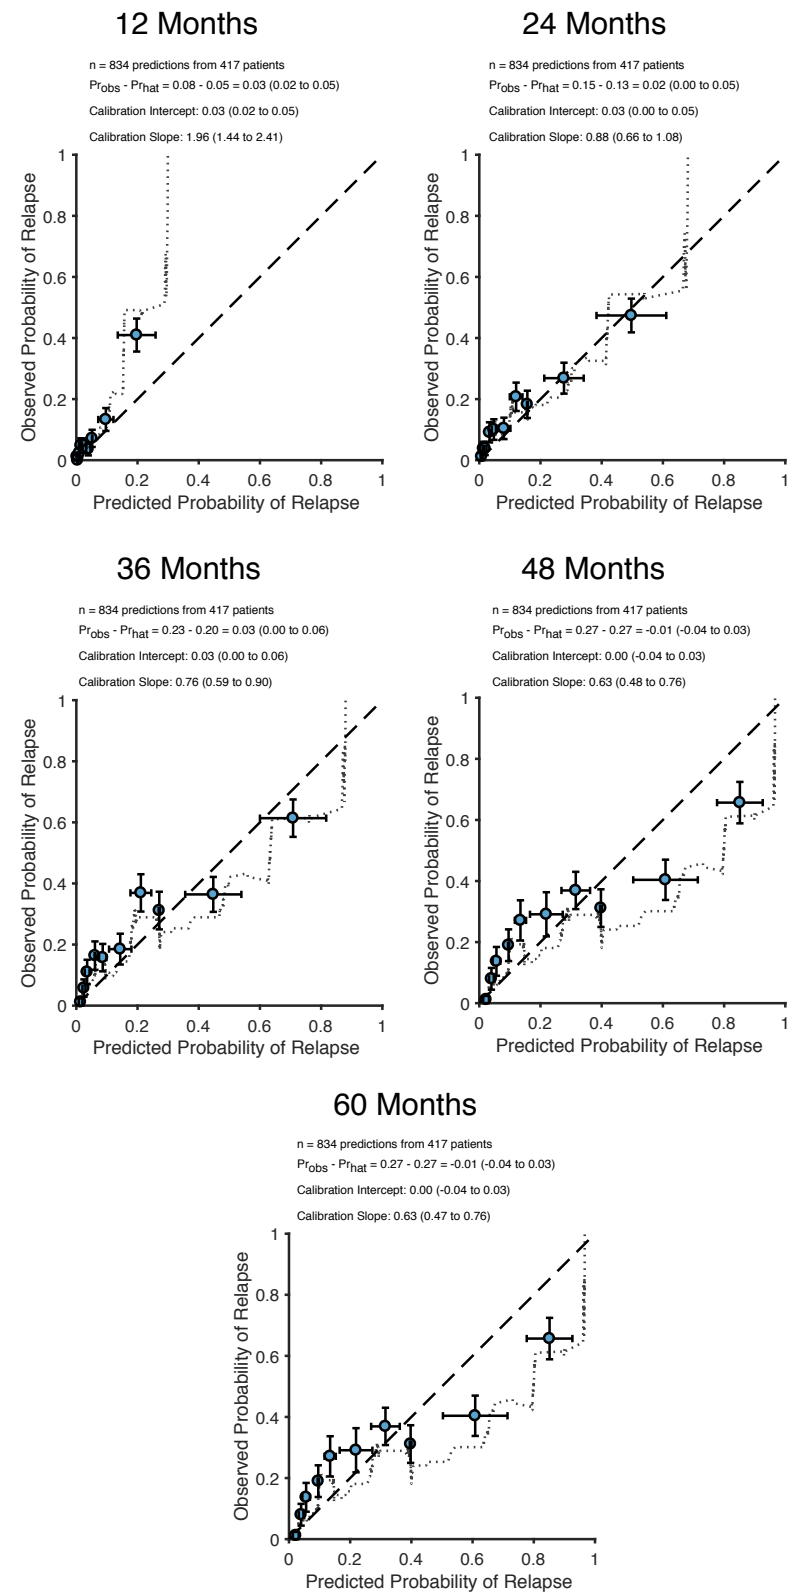

Supplement: NIHMS1603077-supplement-5.pdf [file NIHMS1603077-supplement-5.pdf]

# Figure S5

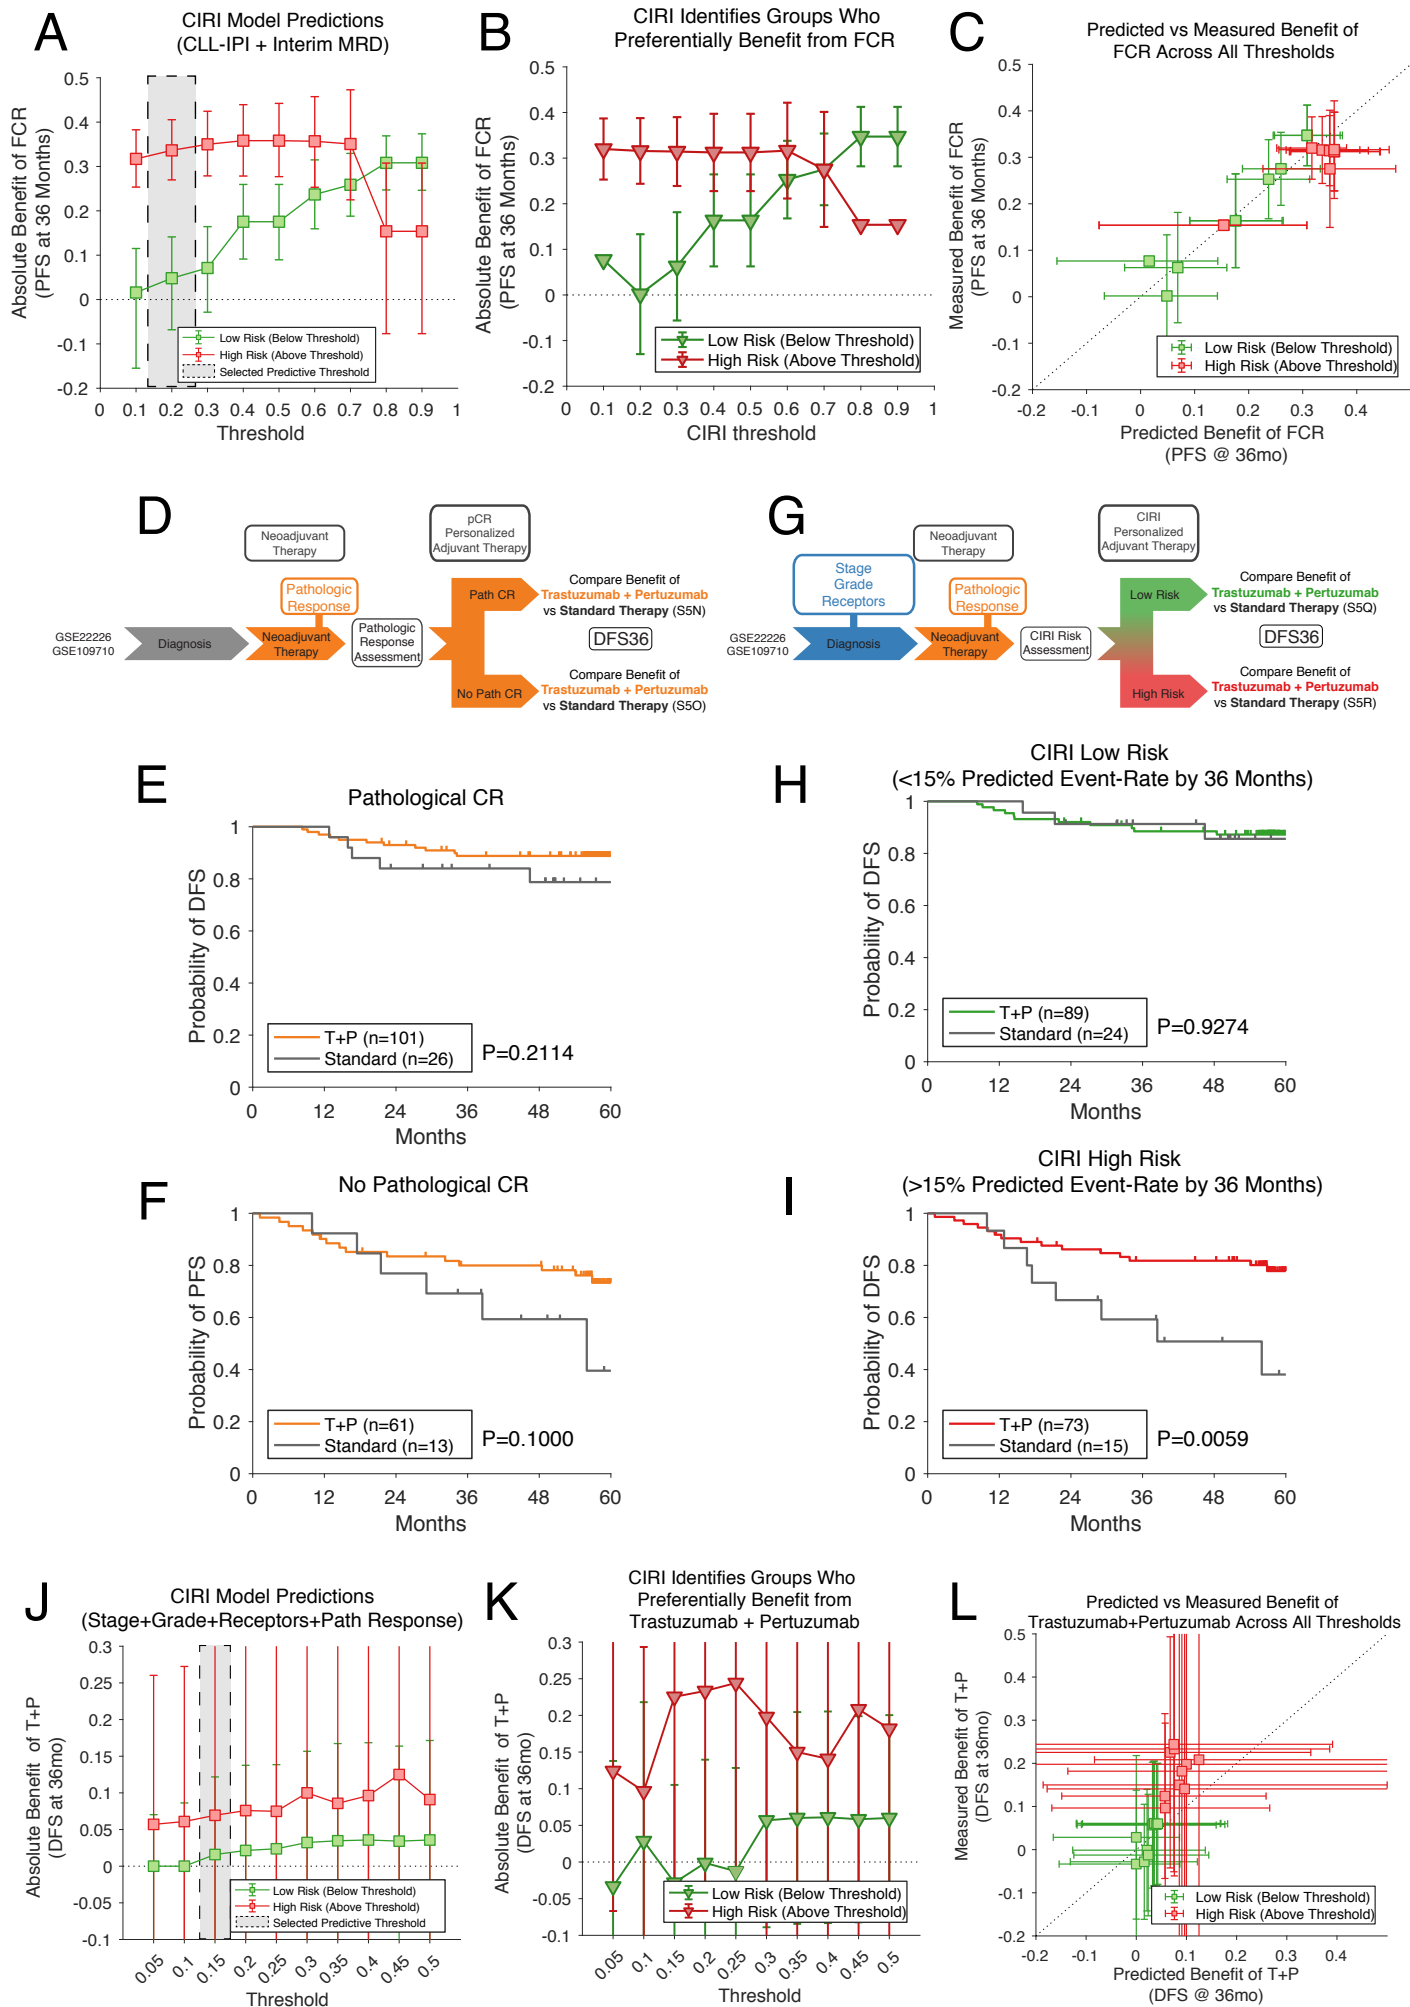

Supplement: NIHMS1603077-supplement-6.pdf [file NIHMS1603077-supplement-6.pdf]

# Figure S6

## A

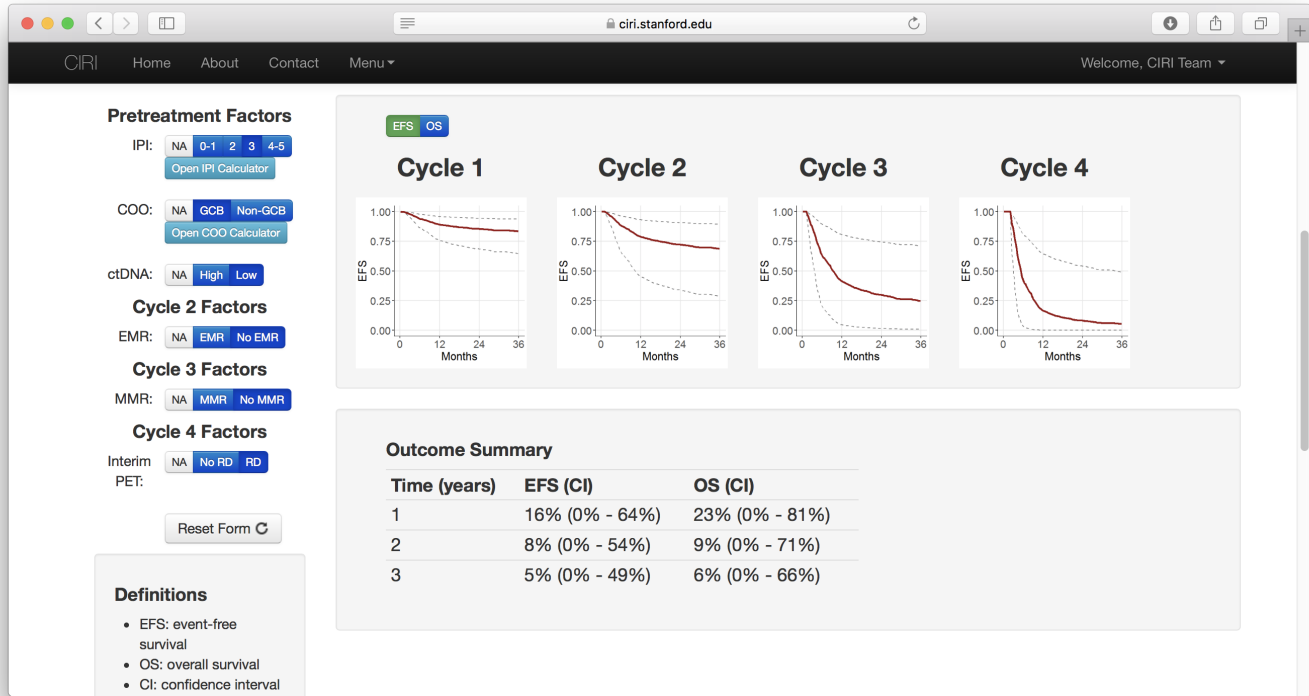

## B

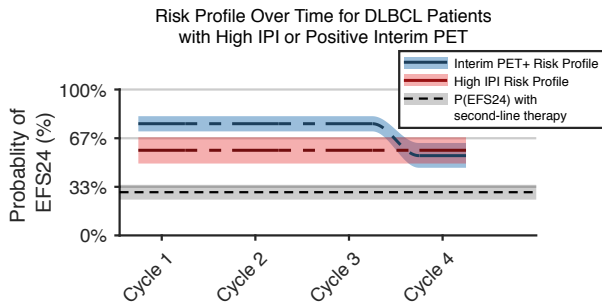

## C

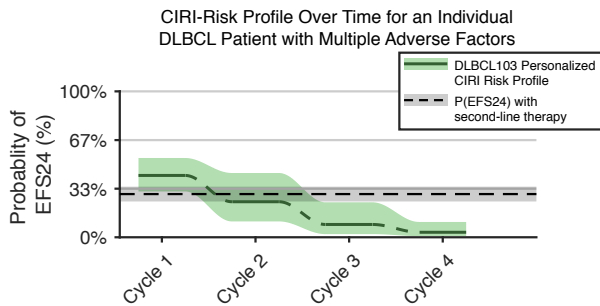

## D

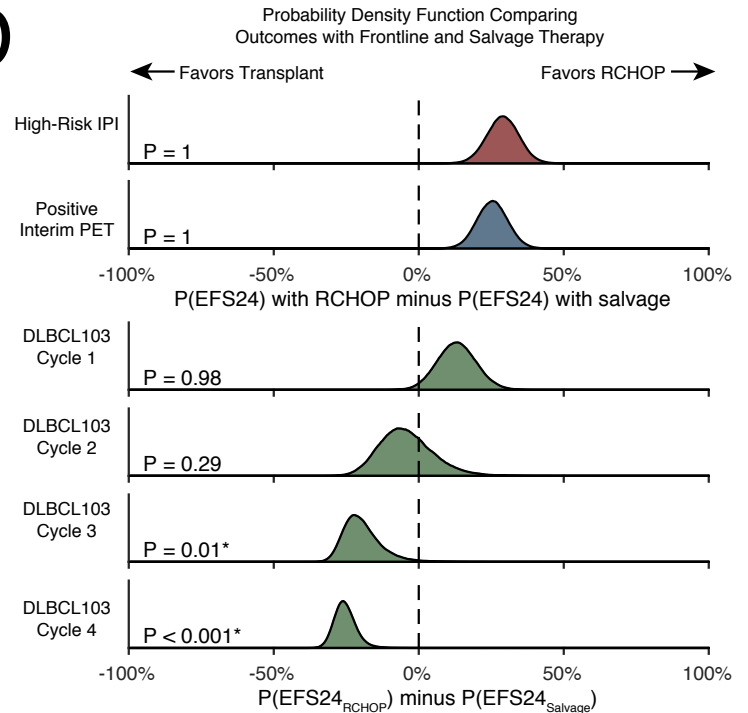

Supplement: NIHMS1603077-supplement-7.pdf [file NIHMS1603077-supplement-7.pdf]
